# Supplementary material
Source: PubMed Central journal article supplement (PMC7482114)
Supplement: Supp_FigS1-S2.pdf [file Supp_FigS1-S2.pdf]

## Supplementary Data

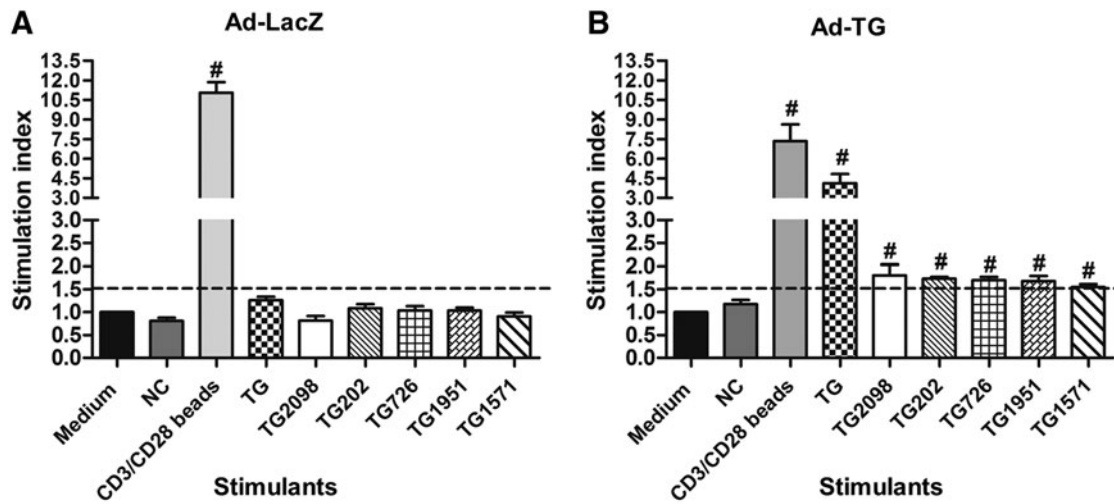

**SUPPLEMENTARY FIG. S1.** Mice immunized with adenovirus containing hTG develop T cell proliferative responses to immunogenic TG peptides. **(A)** Average proliferation indexes of T cells to stimulation with TG, TG2098, TG202, TG726, TG1951, and TG1571 from mice immunized with control Ad-LacZ. **(B)** Average proliferation indexes of T cells to stimulation with TG, TG2098, TG202, TG726, TG1951, and TG1571, and TG1979 from mice immunized with Ad-TG. Stimulation with a scrambled APO peptide was used as NC, and stimulation with CD3/CD28 beads was used as a positive control. Proliferation index  $\geq 1.5$  was considered as a positive response to the stimulant. The pound sign (#) indicates stimulation index  $\geq 1.5$ . The data are shown as means  $\pm$  SE. Statistical analysis was performed by using unpaired *t*-test. (Ad-LacZ,  $n=5-13$ ; Ad-TG,  $n=5-17$ ). APO, apopeptide; hTG, human TG; NC, negative control; SE, standard error; TG, thyroglobulin.

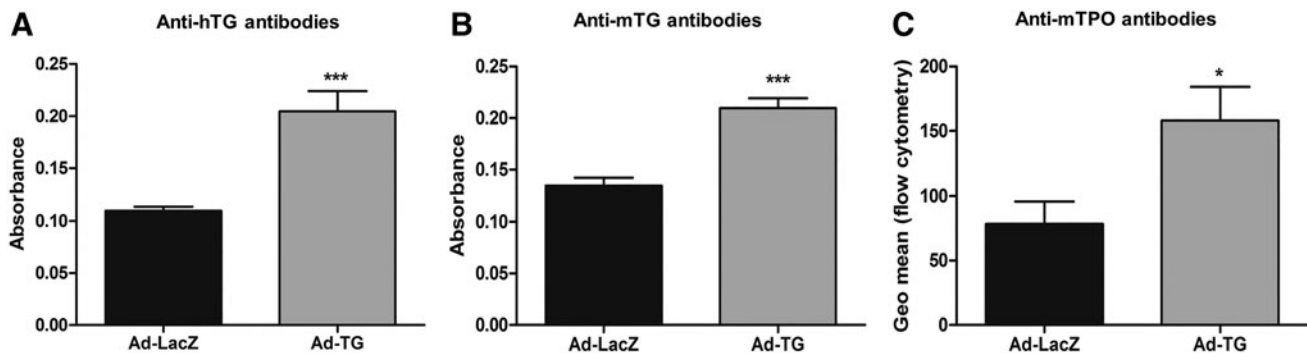

**SUPPLEMENTARY FIG. S2.** Mice immunized with adenovirus containing hTG are positive for hTG, mTG, and mTPO autoantibodies 63 days after initiation of the immunization protocol. **(A)** Anti-hTG antibodies produced by mice immunized with Ad-LacZ, Ad-TG and induced with classical EAT. **(B)** Anti-mTG antibodies produced by mice immunized with Ad-LacZ, Ad-TG and induced with classical EAT. **(C)** Anti-mTPO antibodies produced by mice immunized with Ad-LacZ and Ad-TG. The data are shown as means  $\pm$  SE. Statistical analysis was performed by using one-way ANOVA followed by Student–Newman–Keuls multiple-comparison test or unpaired *t*-test. \* $p < 0.05$ , \*\*\* $p < 0.001$  (Ad-LacZ,  $n=7$ ; Ad-TG,  $n=7$ ; EAT,  $n=7$ ). ANOVA, analysis of variance; EAT, experimental autoimmune thyroiditis; mTG, mouse TG; mTPO, mouse thyroperoxidase.
