# Supplementary material
Source: PubMed Central journal article supplement (PMC7482114)
Supplement: Supp_FigS3-S4-TableS1.pdf [file Supp_FigS3-S4-TableS1.pdf]

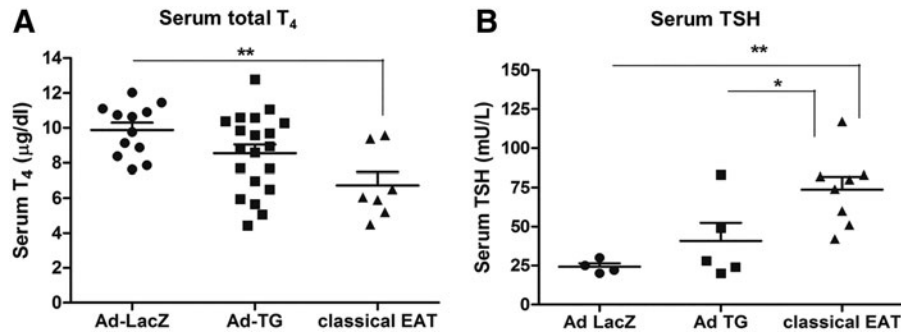

**SUPPLEMENTARY FIG. S3.** Thyroid status in mice immunized with adenovirus containing hTG. **(A)** Concentration of serum total T<sub>4</sub> in mice immunized with control Ad-LacZ, Ad-TG and induced with classical EAT. **(B)** Serum TSH levels in mice immunized with control Ad-LacZ, Ad-TG and induced with classical EAT. The data are shown as means ± SE. Statistical analysis was performed by using one-way ANOVA followed by Student–Newman–Keuls multiple-comparison test. \* $p < 0.05$ , \*\* $p < 0.01$  (Ad-LacZ=4–12; Ad-TG=5–20; classical EAT=7–8). T<sub>4</sub>, thyroxine; TSH, thyrotropin.

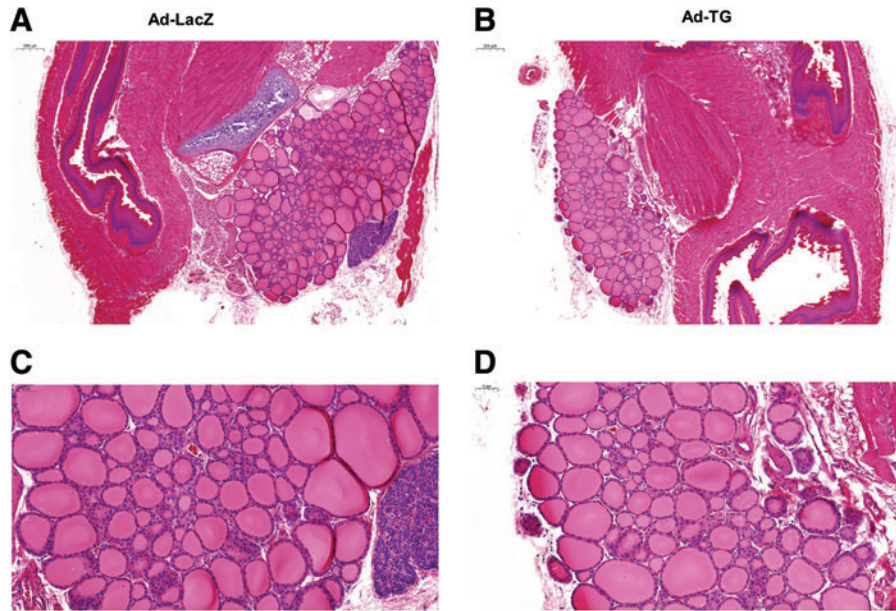

**SUPPLEMENTARY FIG. S4.** Thyroid sections from a mouse immunized with Ad-LacZ **(A, C)** and a mouse immunized with Ad-TG **(B, D)**. Mice did not develop infiltration of the thyroid by lymphocytes and destruction of thyroid follicles. Hematoxylin and eosin staining, magnification 5×**(A, B)** and 20×**(C, D)**. Scale bars, 200 and 50 µm.

**SUPPLEMENTARY TABLE S1. PEPTIDE SEQUENCES**

| Peptide               | Sequence                    |
|-----------------------|-----------------------------|
| TG2098                | LSSVVVDPSIRHFDV             |
| TG1571                | EKVPESKVIKDANAPVAVRSKVPDSEF |
| TG726                 | CPTPCQLQAEQAFRLTV           |
| TG202                 | VNTTDMMIFDLVHSYNRFPD        |
| TG1951                | FRKKVILEDKVKNF              |
| Scrambled<br>APO (NC) | PKDRLKIYNNFTKIGDLSL         |

APO, apopeptide; NC, negative control; TG, thyroglobulin.
